# Supplementary material
Source: PubMed Central journal article supplement (PMC3499630)
Supplement: NIHMS401676-supplement-1.pdf [file NIHMS401676-supplement-1.pdf]

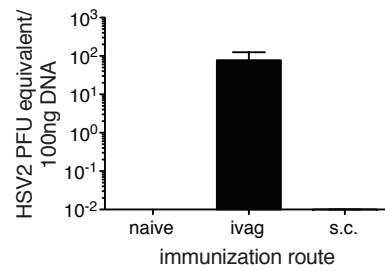

**Supplementary Figure 1. HSV-2 antigen is not present in vagina after subcutaneous immunization.**

Mice were immunized either ivag or s.c. with TK- HSV-2. On day 5 p.i., vaginal tissue from immunized and naive mice were harvested and HSV-2 antigen was measured by qPCR. Data represent two independent experiments. Error bar is SEM.

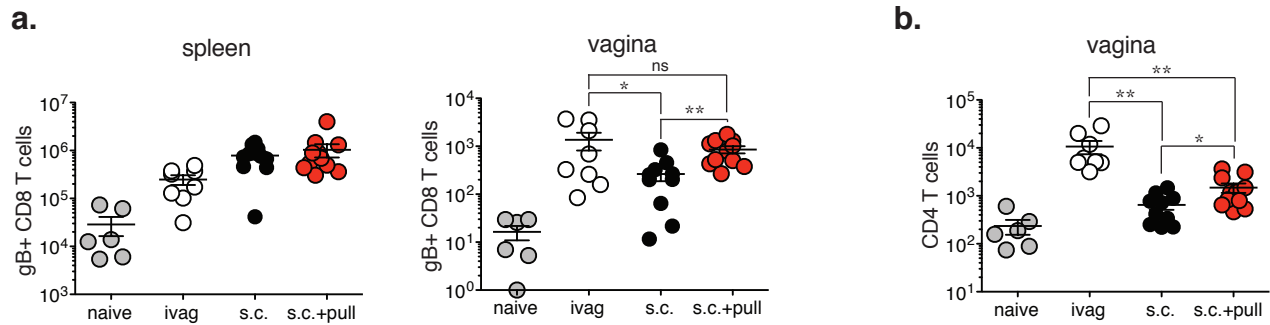

**Supplementary Figure 2. Endogenous HSV-specific CD8 T cells are recruited to the vagina by prime and pull.** Depo-treated naive mice were immunized ivag or s.c. with TK- HSV-2. Five days p.i., s.c. immunized mice were treated ivag with CXCL9 and CXCL10 (s.c.+pull) or PBS (s.c.). One day later, endogenous HSV-specific T cells were enumerated in the indicated tissues. a, gB-specific CD8 T cells in the vagina and spleen were identified by MHC I tetramer. b, CD44+ CD4 T cell numbers in the vagina. Statistical significance was measured by unpaired Student's t-test. \*p<0.05. \*\*p<0.01 and ns = not significant. n=6-11 per group. Data are pooled from three independent experiments. Error bars show SEM.

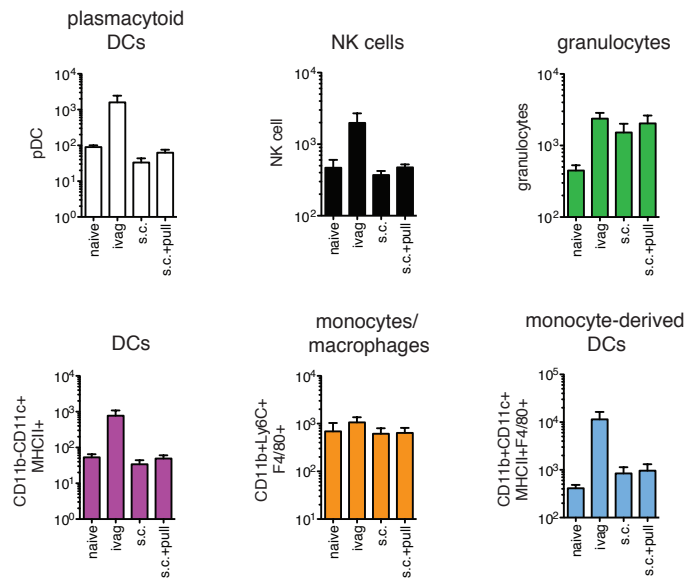

**Supplementary Figure 3. Inflammatory innate cells are not recruited by prime and pull.** Five days post ivag or s.c. immunization with TK- HSV-2, mice were treated with the chemokine pull. Recruitment of different cell populations were analyzed one day post-pull in the vagina. Naive mice were unimmunized. Difference between s.c. and s.c.+pull is not significant for any cell population by unpaired Student's t-test. n=3 (naive), n=9 (ivag, s.c., s.c.+pull). Data are pooled from three independent experiments. Error bars show SEM.

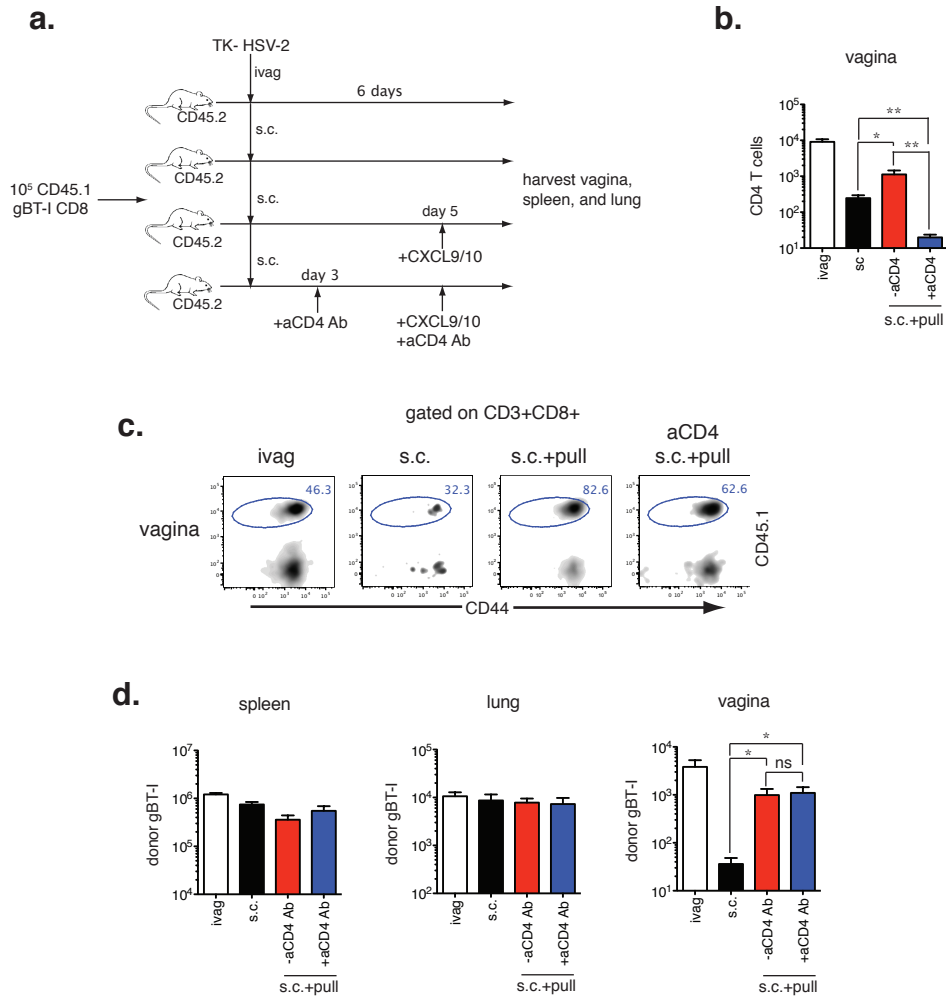

**Supplementary Figure 4. CD8 T cell recruitment during prime and pull does not require CD4 T cell help.** a, Experimental schematic. Mice were immunized ivag or s.c. with TK- HSV-2. At day 3 and day 5 p.i., s.c. immunized mice were injected intraperitoneally with aCD4 antibody (Ab). At day 5 p.i., chemokine pull was applied vag. T cell numbers were determined one day post-pull. b, CD4 T cell numbers were determined in the vaginas of depleting antibody-treated and untreated mice. c, Frequency of donor gBT-I CD8 T cells was measured in the vagina one day post-pull. Plots are gated on total CD8 T cells. Numbers in plots indicate percent of total CD8 T cells that are gBT-I. d, Number of donor gBT-I CD8 T cells was measured in the indicated tissues. n=6 per group. Statistical significance was measured by unpaired Student's t-test. \*p<0.05, \*\*p<0.01, ns = not significant. Data are pooled from 2 independent experiments. Error bars show SEM.

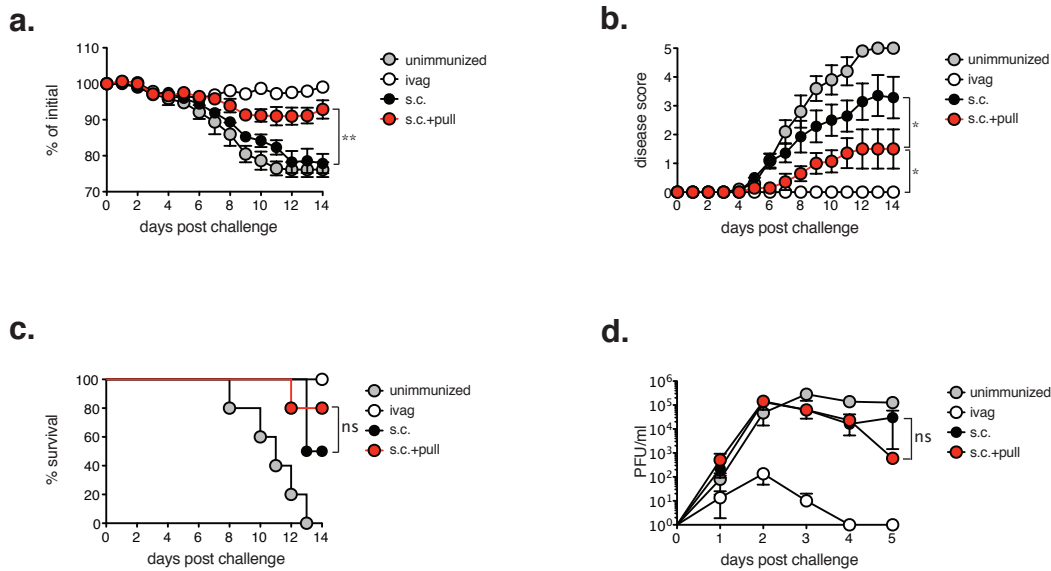

**Supplementary Figure 5. Prime and pull provides protection against lethal WT HSV-2 challenge in the absence of TCR Tg CD8 T cells.** Depo-treated mice were immunized either ivag or s.c. with TK- HSV-2. At 5 days p.i., s.c. immunized mice were treated with either the chemokine pull or PBS. Four weeks post-pull, mice were challenge ivag with a lethal dose of WT HSV-2. Weight loss (a), disease scores (b), survival (c) and viral titers (d) were monitored for two weeks post challenge. \* $p < 0.05$ , \*\* $p < 0.01$ , and ns = not significant. Statistical significance was measured by two-way ANOVA (a, b, and d) or log-rank (Mantel-Cox) test (c).  $n = 5$  (unimmunized, ivag, s.c.+pull),  $n = 6$  (s.c.). Data are pooled from two independent experiments. Error bars show SEM.

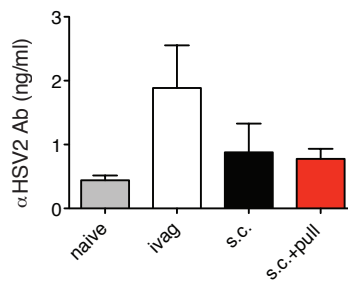

**Supplementary Figure 6. HSV-specific antibodies in the vagina are not affected by chemokine pull.** Vaginal washes from unimmunized, ivag immunized, s.c. immunized and prime and pull mice were collected at 3-4 weeks post-pull. HSV-specific antibodies were measured by ELISA. Data are pooled from two independent experiments. Error bars show SEM.

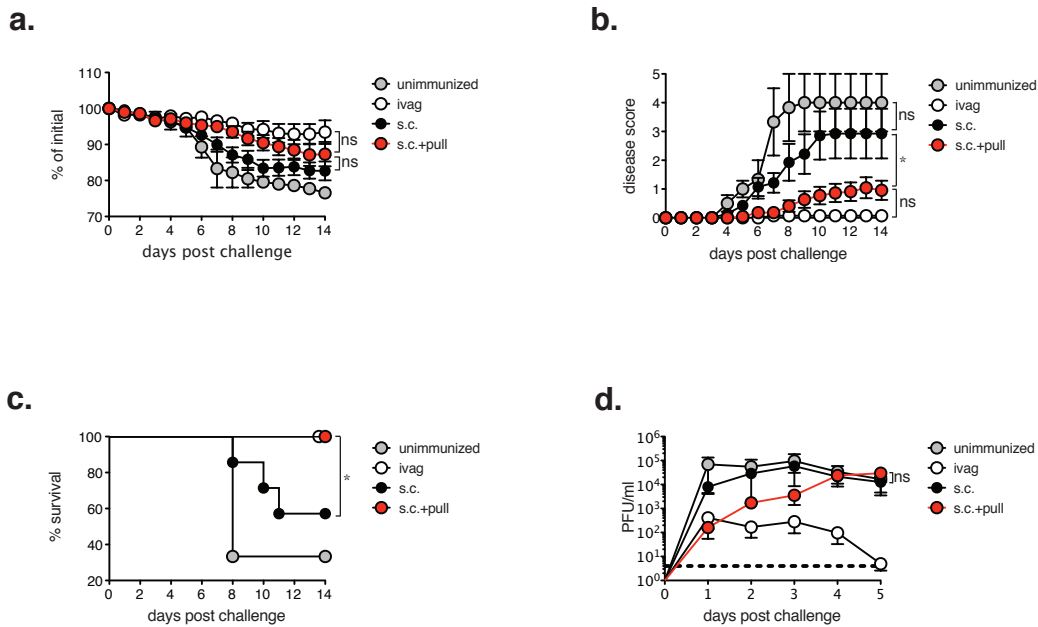

**Supplementary Figure 7. Prime and pull mice are protected 12 weeks post-pull from WT HSV-2 challenge.**  $10^5$  gBT-I CD8 T cells were adoptively transferred to Depo-treated recipients and mice were immunized ivag or s.c. with TK- HSV-2 or left unimmunized. Five days p.i., s.c. immunized mice were treated intravaginally with PBS (s.c.) or 3ug each CXCL9 and CXCL10 (s.c.+pull). All groups were Depo-treated again 1-2 weeks post-pull. At 10-12 weeks post-pull, mice were challenged ivag with WT HSV-2 and monitored for weight loss (a), disease score (b) and survival (c). Viral titers were measured from vaginal washes harvested during the first 5 days of challenge (d). Statistical significance was measured by two-way ANOVA (a, b, and d) or log-rank (Mantel-Cox) test (d). \* $p < 0.05$ , ns = not significant.  $n=3$  (unimmunized),  $n=7$  (ivag, s.c.),  $n=11$  (s.c.+pull). Data are pooled from three independent experiments. Error bars show SEM.

## Supplementary Text

List of *p*-values for main figures

**Figure 1. c**, \**p* = 0.0225 (ivag vs. s.c. + pull) and \*\**p* = 0.0019 (s.c. vs. s.c. + pull). **D**, \*\**p* = 0.0037 (ivag vs. s.c. + pull), \*\**p* = 0.0082 (s.c. vs s.c. + pull).

**Figure 2. (b)** In the vagina, \**p* = 0.0171 (naïve vs. d5), \**p* = 0.0399 (d5 vs. d15) and \**p* = 0.0376 (d5 vs. d28). In the spleen, \*\*\**p* < 0.0001 (naïve vs d5), \*\**p* = 0.0016 (d5 vs d15) and \*\**p* = 0.0025 (d5 vs d28). For frequency, \*\**p* = 0.0023 (naïve vs. d5) and \*\*\**p* < 0.0001 (d5 vs. d15, d5 vs. d28). **c**, \**p* = 0.0207 (naïve vs. d5), \**p* = 0.0438 (d5 vs. d28). **d**, \*\*\**p* < 0.0001 (naïve vs. d5), \*\**p* = 0.0033 (d5 vs. d15) and \*\*\**p* = 0.0009 (d5 vs. d28).

**Figure 3. a**, \**p* = 0.0231 (ivag vs. s.c. + pull) and \*\*\**p* = 0.0006 (s.c. vs. s.c. + pull). **c**, \*\**p* = 0.0053 (ivag vs. s.c. + pull). **d**, \*\**p* = 0.0081 (ivag vs. s.c.), \**p* = 0.0382 (s.c. vs. s.c. + pull), **e**, \**p* = 0.0490 (ivag vs. s.c. + pull).

**Figure 4. a**, \*\*\**p* = 0.0006 (s.c. vs. s.c. + pull), \**p* = 0.0425 (ivag vs. s.c. + pull). **b**, \*\*\**p* < 0.0001 (s.c. vs. s.c. + pull), \*\**p* = 0.0063 (ivag vs. s.c. + pull). **c**, \*\**p* = 0.002 (s.c. vs s.c.+pull). **d**, \*\*\**p* = 0.0002 (unimmunized vs. s.c. + pull), ns = not significant (s.c. vs. s.c.+pull). **e**, \*\*\**p* = 0.0007 (unimmunized vs s.c.), \*\**p* = 0.0017 (unimmunized vs. s.c. + pull), and \**p* = 0.0328 (s.c. vs. s.c. + pull).
